# Supplementary material for: Addition products of a P(iii)-isothiocyanate to dialkyl acetylenedicarboxylates: a spirocyclic phosphinimine and a triphosphorus heterocycle with tetra- and penta-coordinate phosphorus
Source: Royal Society of Chemistry journal article supplement (doi:10.1039/b502358k), 2005-01-01
Supplement: b502358k.pdf [file b502358k.pdf]

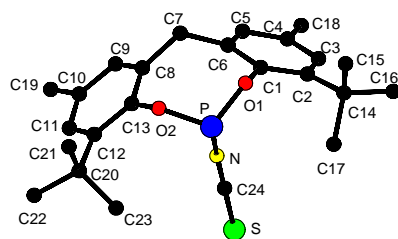

**Fig. 1.** Molecular structure of **1** showing all non-hydrogen atoms.

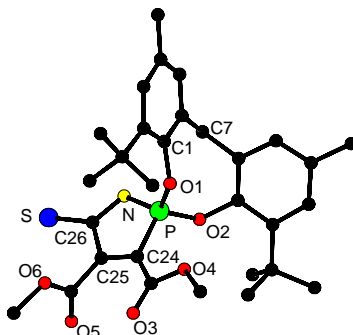

**Fig. 2.** Molecular structure of **2** showing all non-hydrogen atoms. Only selected atoms labelled.

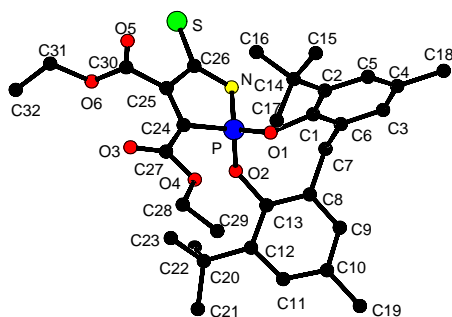

**Fig. 3.** A drawing of  $3.C_6H_5CH_3$  showing only the non-hydrogen atoms; solvent atoms are not shown. Only selected atoms labelled.

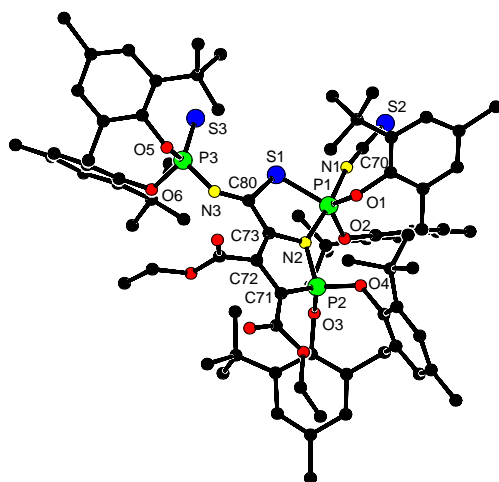

**Fig. 4.** Molecular structure of  $5.2CH_2Cl_2$ ; solvent and hydrogen atoms are omitted. Only selected atoms are labelled.

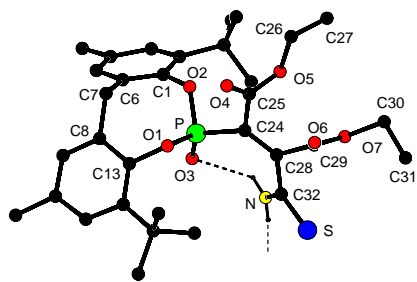

**Fig. 5.** A drawing showing the molecular structure of **8**. All hydrogen atoms except those on nitrogen are omitted for clarity.
